# Supplementary material for: Structure and Chemical Composition of ca. 10-Million-Year-Old (Late Miocene of Western Amazon) and Present-Day Teeth of Related Species
Source: MDPI journal article supplement (doi:10.3390/biology11111636), 2022-11-08
Supplement: s1 [file s1]

**“Structure and chemical composition of ca. 10-million-year-old (Late Miocene of western Amazon) and present-day teeth of related species”**

Supplementary Material:

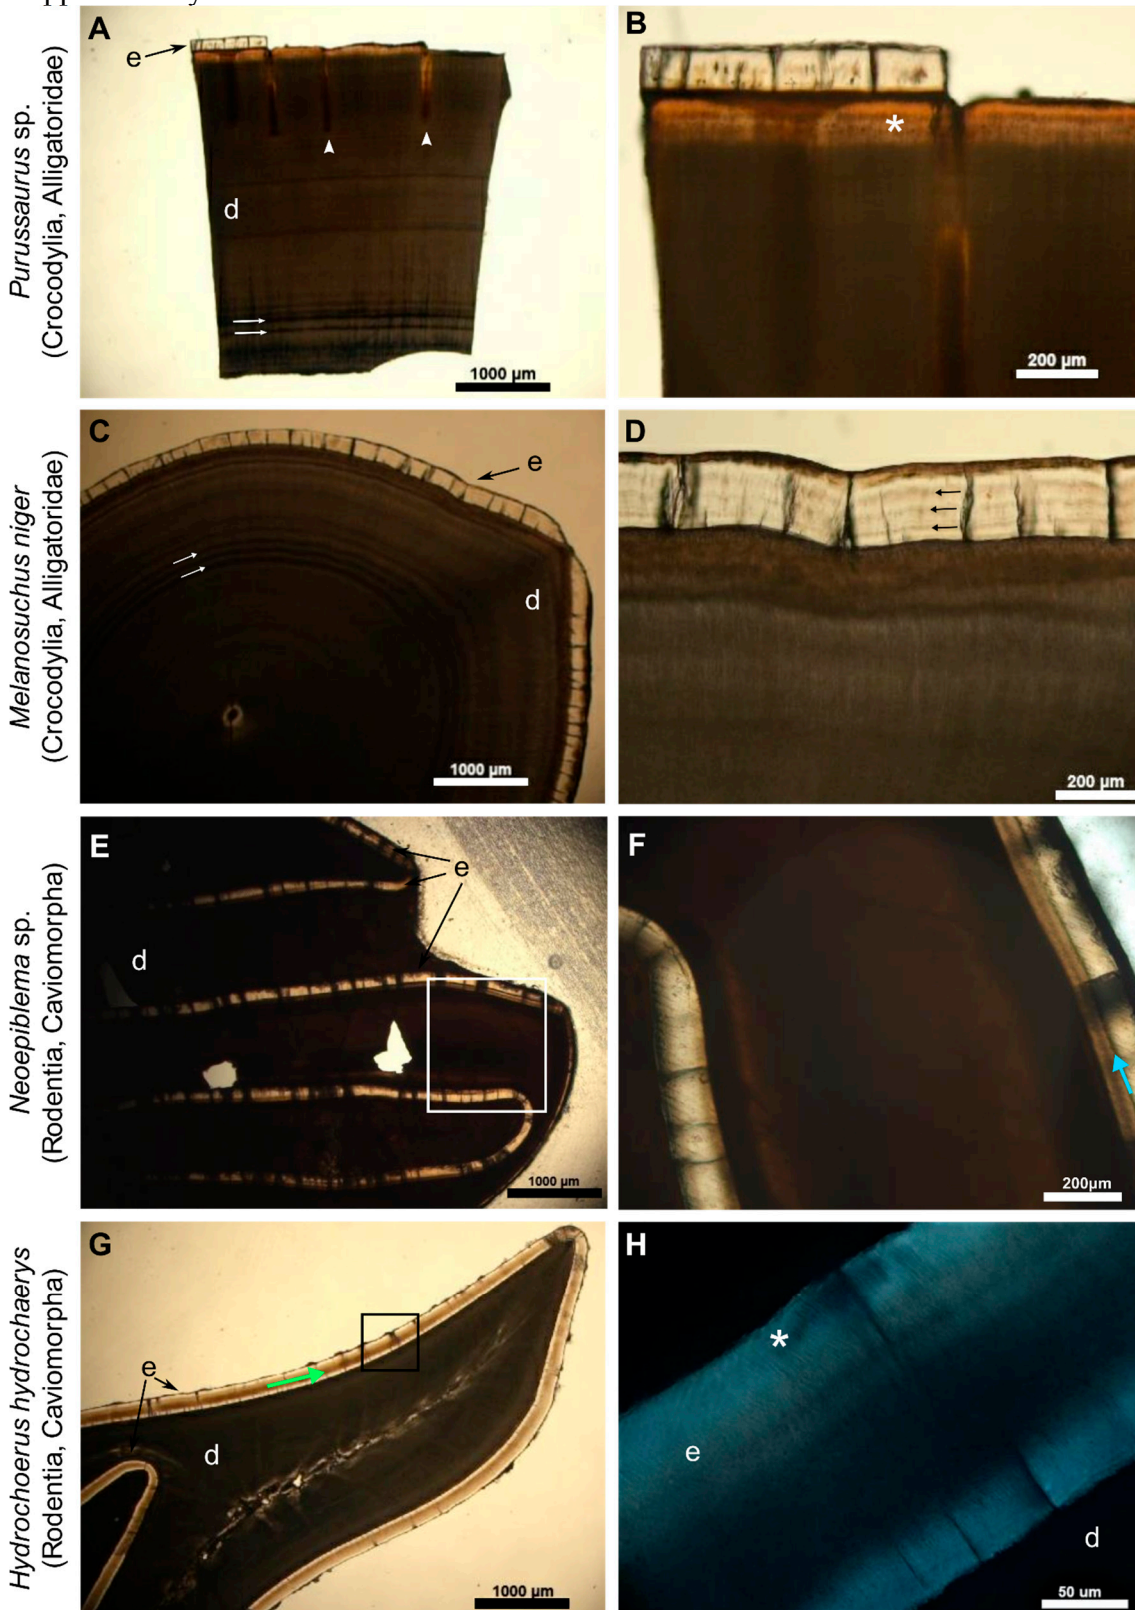

**Figure S1 A photomicrograph panel of ground sections (~ 100 μm) of the 4 teeth used in this study.** The images show that dental enamel (e) is translucent in all specimens, while dentine (d) is dark/opaque in all specimens. There is some superficial mineral loss in dentine of *Purussaurus sp.*, possibly due to acids from the environment (A: arrow head; B: asterisk). The white arrows of panels A and C point to the enamel-dentine junction.

and C show marked apposition lines in the dentine. In D, black arrows in the enamel show appositional lines. In F the blue arrow indicates a very pronounced line. In G the *H. hydrochaeris* enamel is shown; the arrow indicates an area in middle enamel that seems different from the inner and the outer enamel. In H a larger magnification of the black square is shown under polarized light. Due to the thickness of this section, the prismatic aspect of this enamel is difficult to recognize, but in the outer enamel (asterisk) diagonal lines are enamel rods.

**Table S1. ICP-MS method quantification limits (LOQ) of the elements in the study.**

| Element  | LOQ (ng/g) |
|----------|------------|----------|------------|----------|------------|----------|------------|----------|------------|
| Zn (66)  | 0.1        | Co (59)  | 0.05       | Se (82)  | 0.08       | Sm (152) | 0.05       | U (238)  | 0.008      |
| Pb (208) | 0.007      | K (39)   | 0.1        | Ba (138) | 0.05       | Ni (60)  | 0.01       | Be (9)   | 0.001      |
| Fe (54)  | 0.1        | Cd (111) | 0.009      | La (139) | 0.08       | Pd (106) | 0.001      | Ag (107) | 0.001      |
| Mg (24)  | 0.1        | Mn (55)  | 0.01       | Cu (63)  | 0.1        | U (235)  | 0.07       | V (51)   | 0.05       |
| Al (27)  | 0.06       | Ce (140) | 0.08       | Th (232) | 0.06       | U (234)  | 0.22       | Cr (53)  | 0.05       |
| As(75)   | 0.09       | Rb (85)  | 0.02       | Bi (029) | 0.03       |          |            |          |            |

**Table S2. Twenty-seven (27) microelements in the enamel composition determined by ICP-MS.** The sample concentration results in ppb were converted to concentration (ppm) of enamel mass based on Calcium percentage values recovered by EDS-SEM. *Purussaurus* (1): Darkest region of enamel, (2) Predominant brown enamel, (3) Yellow region of enamel.

| Element (Isotope) | Sample (µg/g) ppm          |                            |                            |                 |                        |                        |
|-------------------|----------------------------|----------------------------|----------------------------|-----------------|------------------------|------------------------|
|                   | <i>Purussaurus</i> sp. (1) | <i>Purussaurus</i> sp. (2) | <i>Purussaurus</i> sp. (3) | <i>M. niger</i> | <i>Neoepiblema</i> sp. | <i>H. hydrochaeris</i> |
| Zn (66)           | 114836                     | -                          | 44509                      | -               | 234297                 | 96565                  |
| Pb (208)          | 36873                      | 25110                      | 10950                      | 528             | 22306                  | 860                    |
| Fe (54)           | -                          | -                          | -                          | 17053           | 14774                  | 5872                   |
| Mg (24)           | 13468                      | -                          | 7172                       | 2602            | 14827                  | 11696                  |
| Al (27)           | 9211                       | -                          | 3990                       | 642             | 14412                  | 8233                   |
| Co (59)           | 8411                       | 5630                       | 2412                       | 55              | 4926                   | 114                    |
| K (39)            | 6761                       | 5239                       | 4471                       | 4271            | 7416                   | 1060                   |
| Cd (111)          | 3995                       | 2731                       | 1183                       | 46              | 2334                   | 82                     |
| Mn (55)           | 2650                       | 1134                       | 1715                       | 1372            | 3285                   | 93                     |
| Ce (140)          | 717                        | -                          | 222                        | 56              | 1514                   | 38                     |
| Se (82)           | 386                        | -                          | 20                         | -               | 72                     | 177                    |
| Ba (138)          | 299                        | -                          | 353                        | 993             | 285                    | 222                    |
| La (139)          | 228                        | -                          | 64                         | 23              | 576                    | 26                     |
| Cu (63)           | 179                        | 17                         | 46                         | 13              | 135                    | -                      |
| Th (232)          | 125                        | -                          | 90                         | 0.7             | 871                    | 1.4                    |
| Sm (152)          | 109                        | -                          | 41                         | 4.6             | 177                    | -                      |

|          |     |     |     |       |      |      |
|----------|-----|-----|-----|-------|------|------|
| Ni (60)  | 78  | 45  | 17  | 21    | 30   | 13   |
| Pd (106) | 36  | 1.0 | 8.3 | -     | 139  | -    |
| U (235)  | 36  | -   | 44  | 2.0   | 436  | -    |
| U (238)  | 10  | -   | 4.8 | 0.01  | 176  | -    |
| U (234)  | -   | -   | -   | -     | 1224 | -    |
| Be (9)   | 13  | 3.0 | 5.8 | 3.2   | 26   | -    |
| Tl (205) | 5.3 | -   | 0.4 | 0.2   | 4.4  | 0.1  |
| Ag (107) | 2.3 | 20  | 3.2 | 0.03  | 26   | -    |
| V (51)   | -   | -   | 177 | -     | 819  | 500  |
| Cr (53)  | -   | -   | 721 | -     | 2501 | 1798 |
| As (75)  | -   | -   | -   | -     | 461  | 179  |
| Rb (85)  | -   | -   | 1.2 | 12    | -    | -    |
| Bi (209) | -   | -   | -   | 0.003 | 50   | -    |

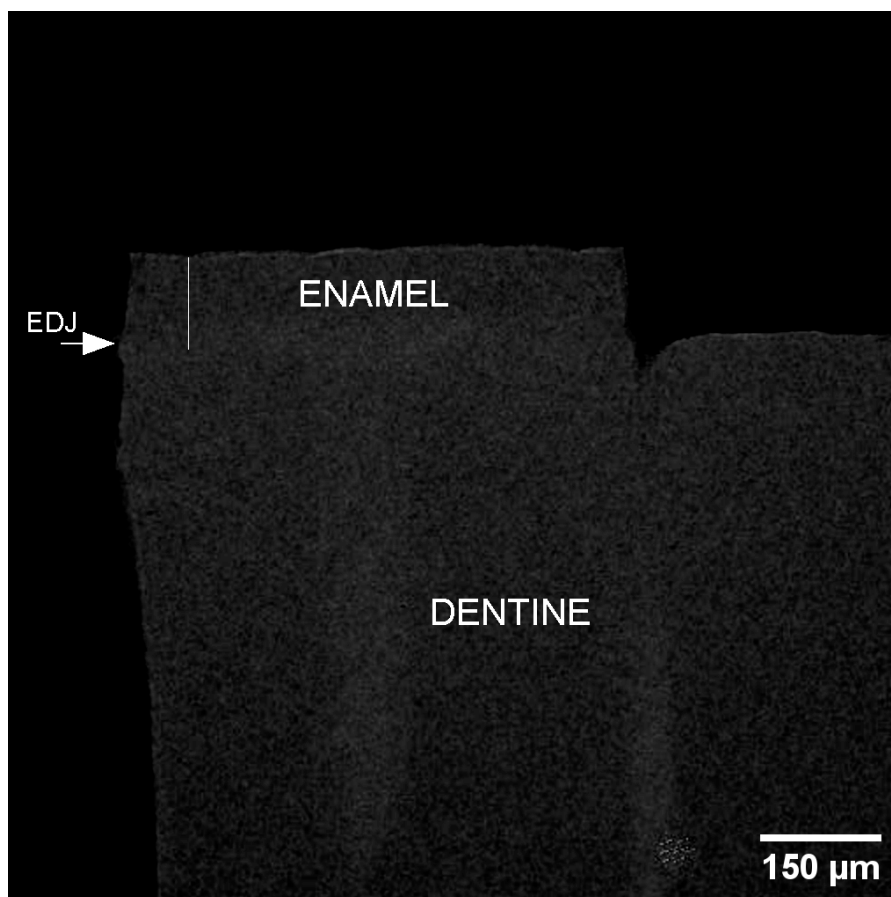

**Figure S2. Microradiographic image of a ground section of dental enamel sample from *Purussaurus* sp.** The arrow indicates the enamel-dentine junction (EDJ). Points of biochemical components (mineral, water, and organic) measurements (at 15, 35, 55, 75, and 95  $\mu\text{m}$  from the enamel surface) were located along the longitudinal line shown in the enamel layer. The enamel thickness is 115  $\mu\text{m}$ .

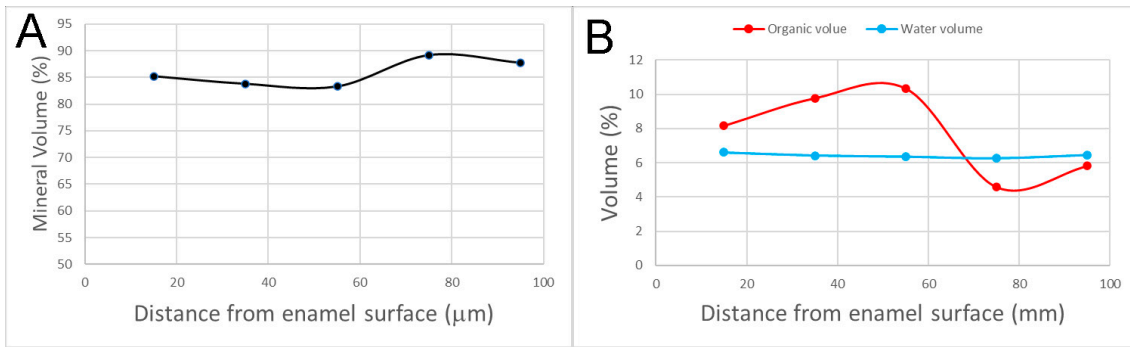

**Figure S3. Mineral (A), organic (B), and total water (B) enamel component volumes of *Purussaurus* sp. at histological points located along the longitudinal line shown in Supplementary Figure 2.**

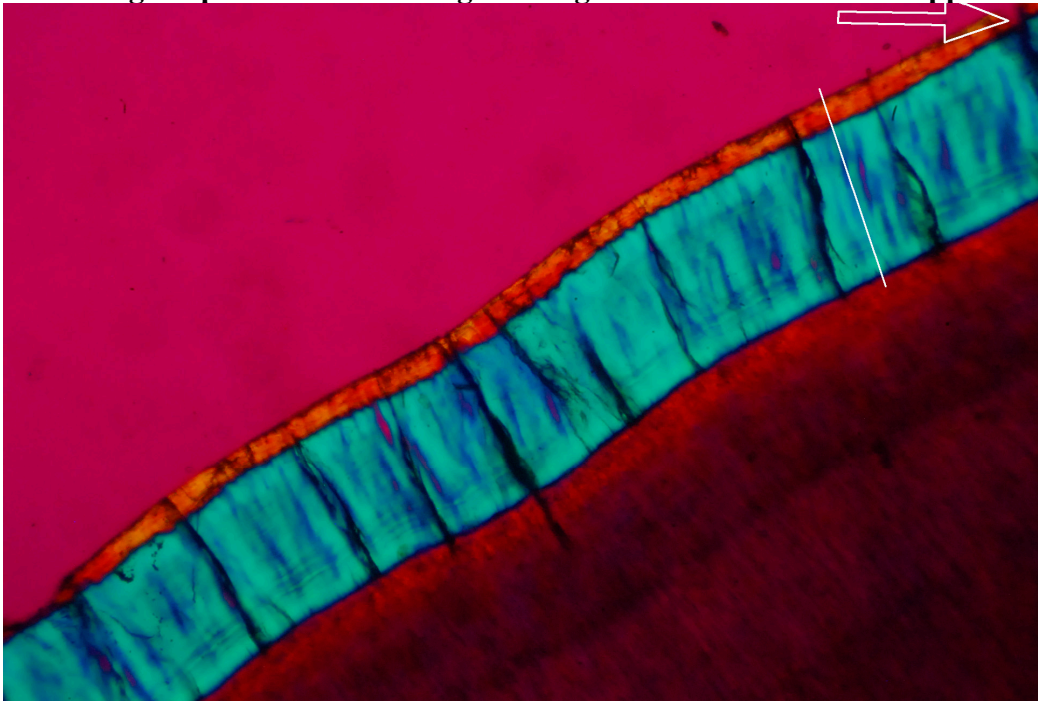

**Figure S4. Ground section of dental enamel sample from *Melanosuchus niger* under polarizing microscopy.** The image was taken with the Red I filter (most of the enamel is shown in blue). The ground section was submitted to water immersion before analysis. On the surface of the enamel there is a layer that is different from the underlying enamel (orange).

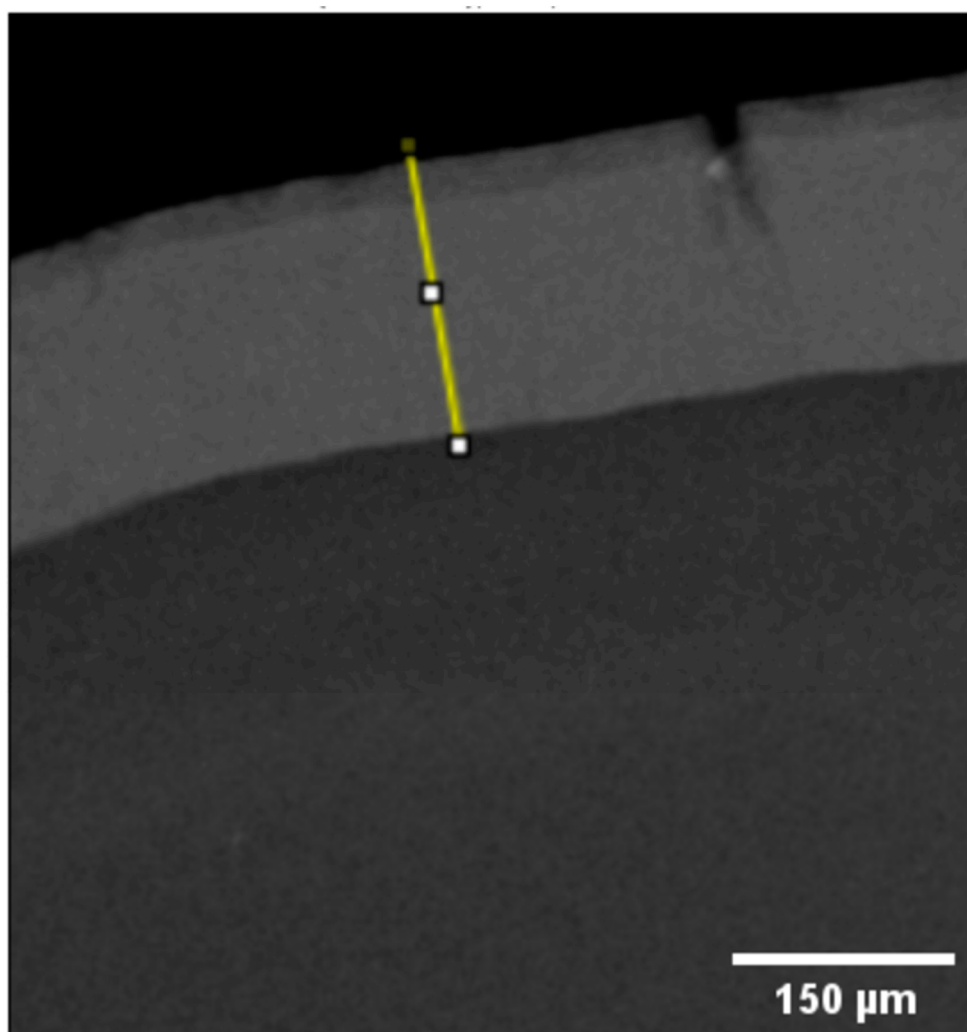

**Figure S5. Microradiographic image of a ground section of dental enamel sample from *M. niger*.** Points of biochemical components (mineral, water, and organic) measurements (at 15, 55, 95, 135, and 175  $\mu\text{m}$  from the enamel surface) were located along the longitudinal line shown in the enamel layer. The enamel thickness is 190  $\mu\text{m}$ .

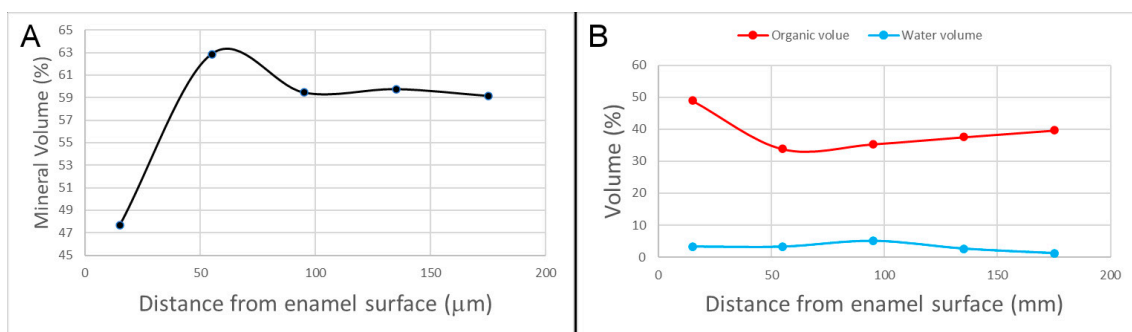

**Figure S6. Mineral (A), organic (B), and total water (B) enamel component volumes of *M. niger* at histological points located along the longitudinal line shown in Figure 5.**

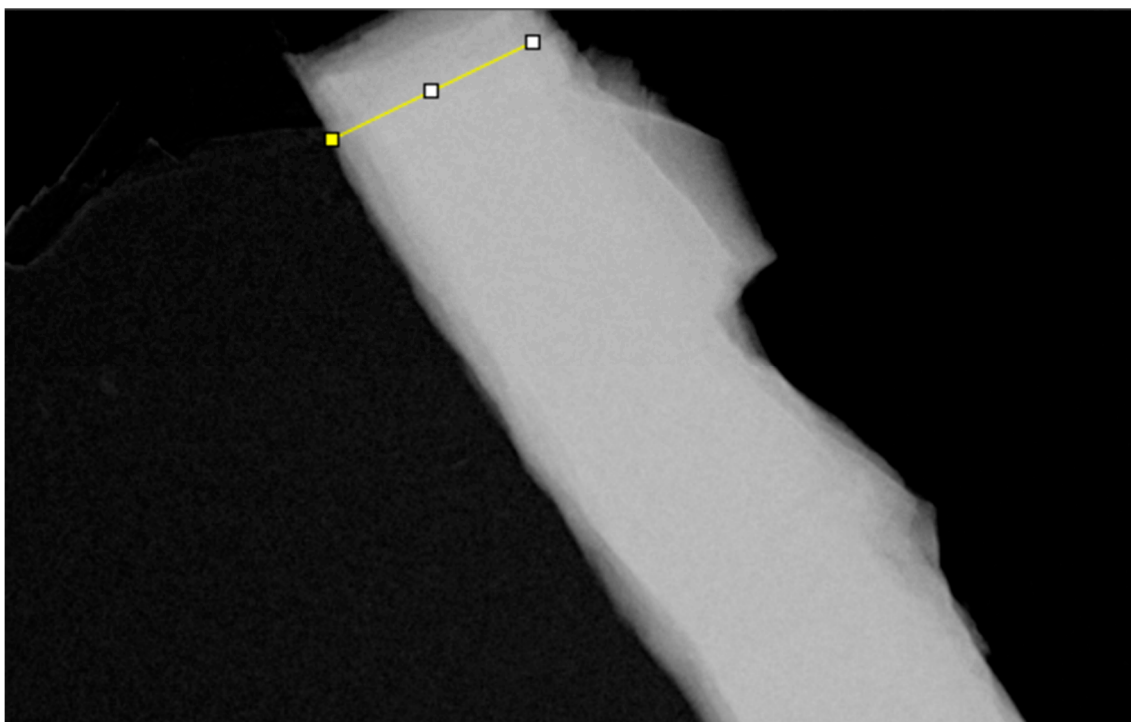

**Figure S7. Microradiographic image of a ground section of dental enamel sample from *Neopiblema* sp.** Points of biochemical components (mineral, water, and organic) measurements (at 40, 70, 100, 130, and 160  $\mu\text{m}$  from the enamel surface) were located along the longitudinal line shown in the enamel layer. The enamel thickness is 205  $\mu\text{m}$ .

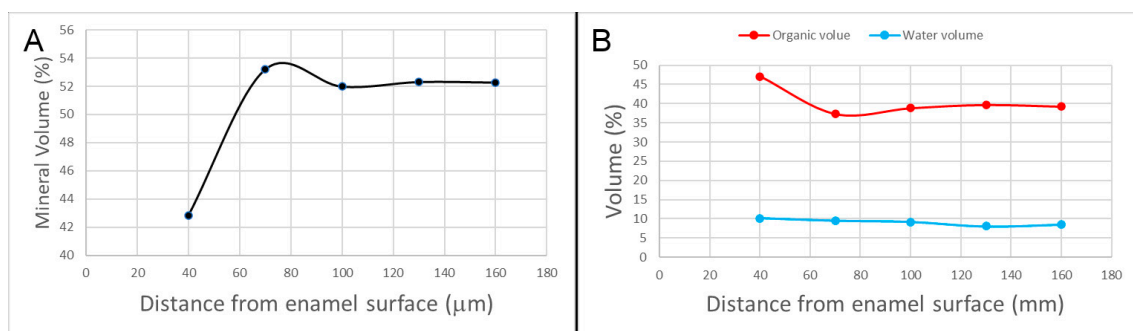

**Figure S8. Mineral (A), organic (B), and total water (B) enamel component volumes of *Neopiblema* sp. at histological points located along the longitudinal line shown in Figure 7.**



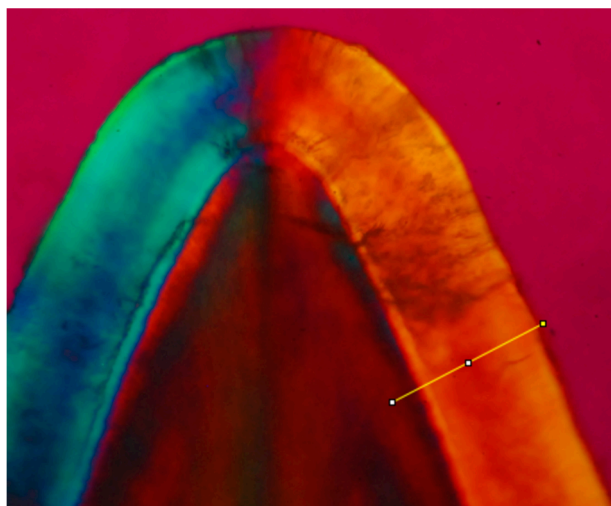

**Figure S9.** Image of a ground section of dental enamel sample from *Hydrochoerus hydrochaeris* under polarizing microscopy. The image was taken with the Red I filter. The ground section was submitted to water immersion before analysis.

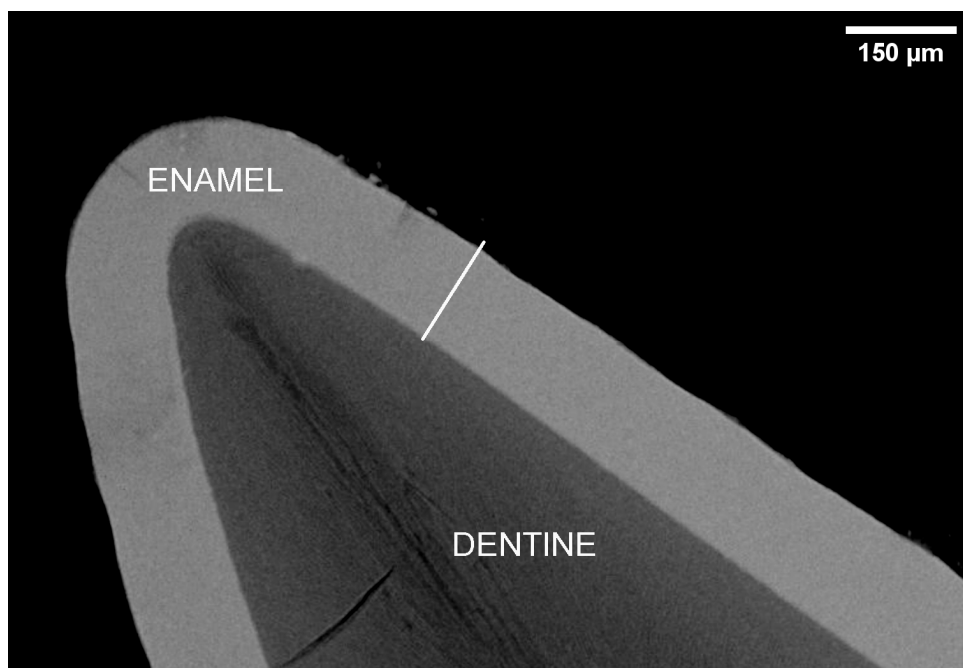

**Figure S10.** Microradiographic image of a ground section of dental enamel sample from *H. hydrochaeris*. Points of biochemical components (mineral, water, and organic) measurements (at 20, 45, 70, 95, and 120  $\mu\text{m}$  from the enamel surface) were located along the longitudinal line shown in the enamel layer. The enamel thickness is 145  $\mu\text{m}$ .

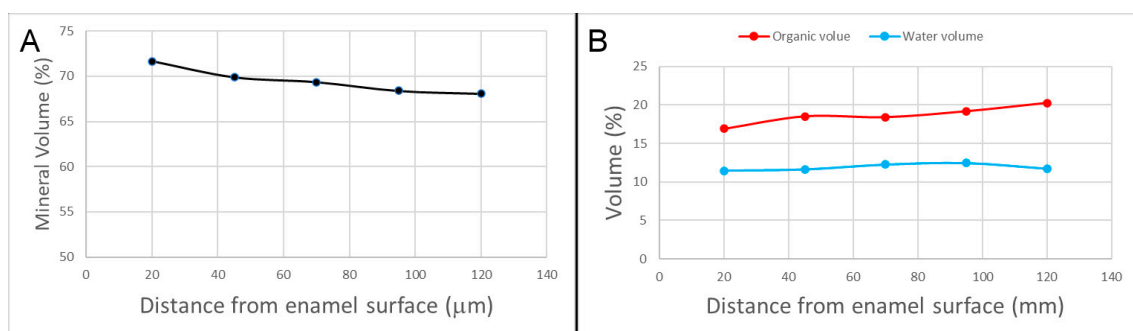

**Figure S11. Mineral (A), organic (B), and total water (B) enamel component volumes of *H. hydrochaeris* at histological points located along the longitudinal line shown in Figure 10.**
